# Supplementary material for: Compensatory Activation of PI3K/AKT Signaling Protects Against Cardiomyocyte Apoptosis in Pulmonary Hypertension–Induced Right Ventricular Dysfunction
Source: Research Square preprint supplement (doi:10.21203/rs.3.rs-8146540/v1), 2025-12-12
Supplement: Supplementary file 1 [file 77dc06c50185187909200138.pdf]

Ref: 253971

Permission is granted to Scientific Reports of Springer Nature Ltd to publish both in print and digital under the CC BY 4.0 open access license the result of using KEGG and the following KEGG images in the article "Compensatory Activation of PI3K/AKT Signaling Protects Against Cardiomyocyte Apoptosis in Pulmonary Hypertension–Induced Right Ventricular Dysfunction" written by Han Zhang&, Qixu Zhao&, Jiashu Sun, Yusong Deng, Guofeng Xing, Weiran Duan, Gang Li, Qiang Wang and colleagues:

- PI3K-Akt signaling pathway (map04151)

subject to the condition that the original source is acknowledged by citing at least one KEGG paper.

Permission granted:



Naomi Takahashi, Kanehisa Laboratories

Date: 5 November 2025

Copyright holder: Kanehisa Laboratories
